# Supplementary material for: Effects of Stathmin 1 Gene Knockout on Behaviors and Dopaminergic Markers in Mice Exposed to Social Defeat Stress
Source: PubMed Central journal article supplement (PMC6769668; doi:10.3390/brainsci9090215), 2019-08-26
Supplement: brainsci-09-00215-s001.pdf [file brainsci-09-00215-s001.pdf]

## Supplementary

Supplementary Table S1 Results for locomotor activities

| Parameter                      | Group | WT              |                |                 | $p^a$   | KO              |                 |                  | $p^a$   | $p^b$   | $p^c$ |
|--------------------------------|-------|-----------------|----------------|-----------------|---------|-----------------|-----------------|------------------|---------|---------|-------|
|                                |       | Before          | After          | Change          |         | Before          | After           | Change           |         |         |       |
| Distance traveled (cm)         | Con   | 8163.908 ± 453  | 9655.283 ± 733 | 1491.376 ± 416  | 0.126   | 12324.229 ± 532 | 11178.705 ± 674 | -1145.524 ± 48.5 | 0.210   | < 0.001 | 0.023 |
|                                | Uns   | 9274.856 ± 551  | 7583.129 ± 657 | -1691.727 ± 518 | 0.006   | 15039.248 ± 545 | 13039.852 ± 784 | -1999.397 ± 95.9 | 0.010   | < 0.001 | 0.713 |
|                                | Sus   | 8841.456 ± 377  | 7323.651 ± 498 | -1517.805 ± 598 | 0.020   | 13026.641 ± 770 | 10914.460 ± 806 | -2112.182 ± 77.9 | 0.029   | < 0.001 | 0.583 |
| Locomotion time (s)            | Con   | 1013.09 ± 47.6  | 1083.75 ± 46.5 | 70.66 ± 52.1    | 0.202   | 1334.945 ± 60   | 1215.098 ± 64.4 | -119.846 ± 73.7  | 0.143   | < 0.001 | 0.052 |
|                                | Uns   | 1078.538 ± 65.3 | 856.489 ± 79.1 | -222.049 ± 95.9 | 0.039   | 1493.883 ± 28.3 | 1378.627 ± 43.4 | -115.257 ± 37    | 0.009   | < 0.001 | 0.314 |
|                                | Sus   | 1086.015 ± 39.8 | 839.773 ± 60.5 | -246.243 ± 77.9 | 0.006   | 1316.526 ± 47.2 | 1178.622 ± 67.2 | -137.904 ± 60.6  | 0.034   | < 0.001 | 0.281 |
| Time spent in central zone (s) | Con   | 256.731 ± 36.4  | 127.193 ± 26.6 | -129.538 ± 41.4 | 0.013   | 143.042 ± 14.6  | 57.811 ± 12.9   | -85.231 ± 8.71   | < 0.001 | 0.015   | 0.337 |
|                                | Uns   | 183.462 ± 37.9  | 82.545 ± 16.8  | -100.917 ± 42.8 | 0.036   | 119.337 ± 9.52  | 36.903 ± 4.51   | -82.433 ± 7.79   | < 0.001 | 0.123   | 0.678 |
|                                | Sus   | 228.065 ± 34.6  | 88.185 ± 15.1  | -139.88 ± 28.3  | < 0.001 | 144.919 ± 17.6  | 56.994 ± 7.43   | -87.925 ± 17.1   | < 0.001 | 0.043   | 0.464 |

Data were expressed in mean ± S.E.M;  $p^a$  comparison between before and after by paired t test;  $p^b$  comparison of before between WT and KO mice by unpaired t test;  $p^c$  comparison of change between WT and KO mice by unpaired t test. Con, Control; KO, Knock Out; Sus, Susceptible; Uns, Unsusceptible; WT, Wild-Type.

Supplementary Table S2. Results for NORT

| Parameter         | Group | WT             |                |                 | $p^a$ | KO             |                |                 | $p^a$ | $p^b$ | $p^c$ |
|-------------------|-------|----------------|----------------|-----------------|-------|----------------|----------------|-----------------|-------|-------|-------|
|                   |       | Before         | After          | Change          |       | Before         | After          | Change          |       |       |       |
| Recognition index | Con   | 0.66 ± 0.0159  | 0.658 ± 0.0133 | -0.002 ± 0.0222 | 0.945 | 0.592 ± 0.0115 | 0.566 ± 0.0235 | -0.026 ± 0.027  | 0.355 | 0.002 | 0.495 |
|                   | Uns   | 0.645 ± 0.0133 | 0.58 ± 0.0164  | -0.065 ± 0.0183 | 0.004 | 0.613 ± 0.0228 | 0.528 ± 0.0191 | -0.086 ± 0.03   | 0.015 | 0.247 | 0.564 |
|                   | Sus   | 0.651 ± 0.0122 | 0.576 ± 0.021  | -0.075 ± 0.0292 | 0.021 | 0.604 ± 0.0148 | 0.538 ± 0.0152 | -0.066 ± 0.0215 | 0.007 | 0.02  | 0.803 |

Data were expressed in mean ± S.E.M;  $p^a$  comparison between before and after by paired t test;  $p^b$  comparison of before between WT and KO mice by unpaired t test;  $p^c$  comparison of change between WT and KO mice by unpaired t test. Con, Control; KO, Knock Out; Sus, Susceptible; Uns, Unsusceptible; WT, Wild-Type.

Supplementary Table S3 Results for Social interaction test

| Parameter                          | Group | WT             |                |                 | $p^a$   | KO            |                |               | $p^a$   | $p^b$   | $p^c$   |
|------------------------------------|-------|----------------|----------------|-----------------|---------|---------------|----------------|---------------|---------|---------|---------|
|                                    |       | Before         | After          | Change          |         | Before        | After          | Change        |         |         |         |
| Neutral behaviors(s)               | Con   | 153.086 ± 14.4 | 152.552 ± 8.62 | -0.534 ± 16     | 0.974   | 150.668 ± 14  | 192.265 ± 13.2 | 41.597 ± 21.4 | 0.073   | 0.905   | 0.128   |
|                                    | Uns   | 190.313 ± 20.7 | 130.081 ± 10.2 | -60.232 ± 20.8  | 0.013   | 75.205 ± 9.61 | 145.197 ± 12.1 | 69.992 ± 12.1 | < 0.001 | < 0.001 | < 0.001 |
|                                    | Sus   | 211.201 ± 12.4 | 97.327 ± 6.88  | -113.874 ± 12.9 | < 0.001 | 86.337 ± 6.71 | 149.583 ± 10.3 | 63.246 ± 12.1 | < 0.001 | < 0.001 | < 0.001 |
| Social investigating behaviors (s) | Con   | 50.218 ± 9.14  | 49.773 ± 9.96  | -0.445 ± 12     | 0.971   | 24.514 ± 3.34 | 32.431 ± 4.98  | 7.917 ± 4.96  | 0.134   | 0.019   | 0.53    |
|                                    | Uns   | 54.955 ± 12.6  | 24.928 ± 9.43  | -30.027 ± 13.7  | 0.049   | 29.599 ± 5.9  | 25.467 ± 9.35  | -4.133 ± 9.05 | 0.656   | 0.085   | 0.13    |
|                                    | Sus   | 54.035 ± 9.15  | 11.943 ± 3.57  | -42.093 ± 9.57  | < 0.001 | 25.333 ± 4.76 | 21.204 ± 4.47  | -4.129 ± 6.88 | 0.566   | < 0.001 | 0.003   |
| Dominant behaviors(s)              | Con   | 1.942 ± 1.94   | 0.509 ± 0.509  | -1.433 ± 2.05   | 0.499   | 2.394 ± 0.955 | 3.17 ± 2.1     | 0.776 ± 1.83  | 0.679   | 0.836   | 0.08    |
|                                    | Uns   | 9.971 ± 7.04   | 0 ± 0          | -9.971 ± 7.04   | 0.182   | 8.857 ± 4.76  | 1.24 ± 0.907   | -7.617 ± 4.78 | 0.139   | 0.897   | 0.784   |
|                                    | Sus   | 0.661 ± 0.596  | 0.786 ± 0.736  | 0.173 ± 0.967   | 0.869   | 4.157 ± 1.38  | 0.261 ± 0.184  | -3.896 ± 1.33 | 0.010   | 0.01    | 0.023   |
| Submissive behaviors(s)            | Con   | 89.934 ± 41.2  | 39.771 ± 6.88  | -50.163 ± 39.4  | 0.229   | 37.676 ± 8.85 | 64.928 ± 11.4  | 27.251 ± 10.4 | 0.021   | 0.238   | 0.43    |
|                                    | Uns   | 48.068 ± 21.8  | 63.822 ± 7.46  | 15.753 ± 24.5   | 0.531   | 56.766 ± 10.7 | 95.107 ± 17    | 38.341 ± 17.5 | 0.05    | 0.724   | 0.46    |
|                                    | Sus   | 37.621 ± 11    | 75.322 ± 13.8  | 37.701 ± 17.7   | 0.049   | 64.942 ± 13.6 | 106.328 ± 10.5 | 41.387 ± 14.3 | 0.014   | 0.03    | 0.875   |

Data were expressed in mean ± S.E.M;  $p^a$  comparison between before and after by paired t test;  $p^b$  comparison of before between WT and KO mice by unpaired t test;  $p^c$  comparison of change between WT and KO mice by unpaired t test. Con, Control; KO, Knock Out; Sus, Susceptible; Uns, Unsusceptible; WT, Wild-Type.

Supplementary Table S4. Western blot results of Total STMN1, pS16-STMN1/ $\beta$ -actin

| Protein                     | Brain region | WT            |                    |                    | <i>p</i> <sup>a</sup> |
|-----------------------------|--------------|---------------|--------------------|--------------------|-----------------------|
|                             |              | Con           | Uns                | Sus                |                       |
| Total STMN1/ $\beta$ -actin | PFC          | 1 $\pm$ 0.079 | 1.057 $\pm$ 0.043  | 0.955 $\pm$ 0.037  | 0.393                 |
|                             | HIP          | 1 $\pm$ 0.059 | 0.962 $\pm$ 0.058  | 0.964 $\pm$ 0.057  | 0.393                 |
|                             | AMY          | 1 $\pm$ 0.092 | 1.109 $\pm$ 0.096  | 0.85 $\pm$ 0.080   | 0.738                 |
|                             | dST          | 1 $\pm$ 0.078 | 1.013 $\pm$ 0.064  | 0.951 $\pm$ 0.043  | 0.121                 |
| pS16-STMN1/ $\beta$ -actin  | PFC          | 1 $\pm$ 0.096 | 0.653 $\pm$ 0.097* | 0.698 $\pm$ 0.086* | 0.038                 |
|                             | HIP          | 1 $\pm$ 0.12  | 0.788 $\pm$ 0.0908 | 0.843 $\pm$ 0.082  | 0.41                  |
|                             | AMY          | 1 $\pm$ 0.10  | 0.785 $\pm$ 0.06   | 0.979 $\pm$ 0.08   | 0.469                 |
|                             | dST          | 1 $\pm$ 0.116 | 1.049 $\pm$ 0.059  | 1.131 $\pm$ 0.066  | 0.564                 |

Data were expressed in mean  $\pm$  S.E.M; \**p*<0.05 versus control group. Con, Control; KO, Knock Out; Sus, Susceptible; Uns, Unsusceptible;

WT, Wild-Type.

Supplementary Table S5. Western blot results of dopamine D2 receptor isoforms (D2S, D2L)

| Protein    | Region | WT        |               |               | <i>p</i> <sup>a</sup> | KO        |               |               | <i>p</i> <sup>a</sup> |
|------------|--------|-----------|---------------|---------------|-----------------------|-----------|---------------|---------------|-----------------------|
|            |        | Con       | Uns           | Sus           |                       | Con       | Uns           | Sus           |                       |
| D2S /GAPDH | PFC    | 1 ± 0.083 | 1.171 ± 0.089 | 1.237 ± 0.10  | 0.052                 | 1 ± 0.084 | 0.921 ± 0.11  | 0.905 ± 0.025 | 0.062                 |
|            | HIP    | 1 ± 0.087 | 0.851 ± 0.057 | 0.849 ± 0.054 | 0.542                 | 1 ± 0.064 | 1.043 ± 0.05  | 1.014 ± 0.0   | 0.664                 |
|            | AMY    | 1 ± 0.10  | 1.428 ± 0.083 | 1.293 ± 0.097 | 0.695                 | 1 ± 0.058 | 1.128 ± 0.068 | 1.06 ± 0.058  | 0.53                  |
|            | dST    | 1 ± 0.11  | 1.168 ± 0.11  | 1.028 ± 0.11  | 0.575                 | 1 ± 0.028 | 1.034 ± 0.090 | 0.957 ± 0.070 | 0.063                 |
| D2L/GAPDH  | PFC    | 1 ± 0.059 | 1.054 ± 0.05  | 1.273 ± 0.07  | 0.353                 | 1 ± 0.058 | 0.873 ± 0.085 | 0.796 ± 0.027 | 0.685                 |
|            | HIP    | 1 ± 0.05  | 1.079 ± 0.05  | 1.105 ± 0.04  | 0.32                  | 1 ± 0.0   | 1.08 ± 0.08   | 1.032 ± 0.03  | 0.845                 |
|            | AMY    | 1 ± 0.07  | 1.042 ± 0.06  | 0.916 ± 0.10  | 0.056                 | 1 ± 0.08  | 1.176 ± 0.11  | 1.106 ± 0.06  | 0.471                 |
|            | dST    | 1 ± 0.051 | 0.924 ± 0.030 | 0.928 ± 0.046 | 0.627                 | 1 ± 0.049 | 1.046 ± 0.12  | 1.329 ± 0.05  | 0.789                 |

Data were expressed in mean ± S.E.M. Con, Control; KO, Knock Out; Sus, Susceptible; Uns, Unsusceptible; WT, Wild-Type.

Supplementary Table S6. Western blot results of total DARPP-32, p-DARPP-32 Thr34, p-DARPP-32 Thr75

| Protein          | Region   | WT       |                |              | $p^a$ | KO        |                |                | $p^a$ |
|------------------|----------|----------|----------------|--------------|-------|-----------|----------------|----------------|-------|
|                  |          | Con      | Uns            | Sus          |       | Con       | Uns            | Sus            |       |
| DARPP-32 TOTAL   | PFC      | 1 ± 0.10 | 1.188 ± 0.07   | 1.157 ± 0.03 | 0.229 | 1 ± 0.091 | 1.277 ± 0.082  | 1.213 ± 0.034  | 0.056 |
|                  | HIP      | 1 ± 0.13 | 1.141 ± 0.09   | 1.249 ± 0.08 | 0.317 | 1 ± 0.08  | 0.988 ± 0.0    | 0.974 ± 0.03   | 0.964 |
|                  | /β-actin | 1 ± 0.07 | 0.908 ± 0.10   | 1.038 ± 0.09 | 0.681 | 1 ± 0.08  | 1.253 ± 0.07*  | 1.304 ± 0.03** | 0.008 |
|                  | dST      | 1 ± 0.06 | 1.073 ± 0.04   | 1.052 ± 0.05 | 0.747 | 1 ± 0.04  | 1.082 ± 0.01   | 1.147 ± 0.02** | 0.015 |
| p-DARPP-32 Thr34 | PFC      | 1 ± 0.06 | 1.1 ± 0.09     | 0.958 ± 0.07 | 0.632 | 1 ± 0.08  | 1.202 ± 0.08   | 1.198 ± 0.08   | 0.369 |
|                  | HIP      | 1 ± 0.12 | 1.163 ± 0.06   | 1.201 ± 0.07 | 0.413 | 1 ± 0.04  | 1.081 ± 0.07   | 1.188 ± 0.06   | 0.209 |
|                  | /β-actin | 1 ± 0.1  | 0.891 ± 0.12   | 1.195 ± 0.08 | 0.303 | 1 ± 0.03  | 1.046 ± 0.04   | 0.912 ± 0.05   | 0.246 |
|                  | dST      | 1 ± 0.12 | 1.086 ± 0.07   | 1.073 ± 0.09 | 0.875 | 1 ± 0.07  | 1.068 ± 0.1    | 0.966 ± 0.07   | 0.765 |
| p-DARPP-32 Thr75 | PFC      | 1 ± 0.01 | 1.201 ± 0.04** | 1.109 ± 0.02 | 0.005 | 1 ± 0.09  | 1.754 ± 0.22** | 1.707 ± 0.10** | 0.002 |
|                  | HIP      | 1 ± 0.07 | 1.104 ± 0.08   | 1.112 ± 0.06 | 0.645 | 1 ± 0.17  | 1.263 ± 0.14   | 1.383 ± 0.07   | 0.165 |
|                  | /β-actin | 1 ± 0.1  | 1.114 ± 0.12   | 1.292 ± 0.06 | 0.376 | 1 ± 0.12  | 1.014 ± 0.12   | 1.143 ± 0.05   | 0.561 |
|                  | dST      | 1 ± 0.08 | 1.264 ± 0.06   | 1.315 ± 0.06 | 0.065 | 1 ± 0.06  | 0.978 ± 0.11   | 1.021 ± 0.07   | 0.944 |

Data were expressed in mean ± S.E.M; \* $p < 0.05$ , \*\* $p < 0.01$ , \*\*\* $p < 0.001$  versus control group of the same genotype. Con, Control; KO, Knock Out; Sus, Susceptible; Uns, Unsusceptible; WT, Wild-Type.
